# Supplementary material for: Latent profile analysis patterns of exercise, sitting and fitness in adults – Associations with metabolic risk factors, perceived health, and perceived symptoms
Source: PubMed Central journal article supplement (PMC7182226; doi:10.1371/journal.pone.0232210), 2020-04-24
Supplement: pone.0232210.s001.pdf [file pone.0232210.s001.pdf]

1 **S1 Table.** Fit indices of the estimated latent profile analysis

| Model     | LL                                                                                         | #fp | CAIC       | BIC        | ABIC       | Entropy |
|-----------|--------------------------------------------------------------------------------------------|-----|------------|------------|------------|---------|
| 1 profile | -368753.746                                                                                | 8   | 737604.145 | 737596.145 | 737570.721 | na      |
| 2 profile | -361914.799                                                                                | 13  | 723986.660 | 723973.660 | 723932.345 | .693    |
| 3 profile | -358465.181                                                                                | 18  | 717147.832 | 717129.832 | 717072.628 | .941    |
| 4 profile | -354996.390                                                                                | 26  | 710306.904 | 710280.904 | 710198.276 | .685    |
| 5 profile | -354198.838                                                                                | 28  | 708735.963 | 708707.963 | 708618.978 | .721    |
| 6 profile | -353225.896                                                                                | 33  | 706850.488 | 706817.488 | 706712.613 | .711    |
| 7 profile | <u>Converged on local solution (i.e., did not replicate the best log likelihood value)</u> |     |            |            |            |         |

2 *Note.* LL = log-likelihood, #fp = number for free parameters, CAIC = consistent Akaike Information Criterion, BIC = Bayesian Information Criterion, and ABIC = sample-  
 3 size adjusted BIC.

4  
 5  
 6  
 7  
 8  
 9  
 10  
 11  
 12  
 13  
 14  
 15  
 16
