# Supplementary material for: Latent profile analysis patterns of exercise, sitting and fitness in adults – Associations with metabolic risk factors, perceived health, and perceived symptoms
Source: PubMed Central journal article supplement (PMC7182226; doi:10.1371/journal.pone.0232210), 2020-04-24
Supplement: pone.0232210.s002.pdf [file pone.0232210.s002.pdf]

1 **S2 Table.** Drop-out analysis comparing those excluded (n=19.892) and excluded (n=45.078) in multi-adjusted analyses in Fig 2.

|                                      | <u>Excluded</u> | <u>Included</u> | <u>Difference</u> |
|--------------------------------------|-----------------|-----------------|-------------------|
| Sex (women)                          | 42.1% (8377)    | 41.5% (18718)   | p=0.161           |
| Age (year)                           | 42.9 (10.9)     | 43.4 (11.4)     | p<0.0001          |
| <u>Profile</u>                       |                 |                 |                   |
| 1                                    | 11% (2144)      | 16% (7336)      |                   |
| 2                                    | 19% (3846)      | 16% (7381)      |                   |
| 3                                    | 17% (3425)      | 24% (10757)     |                   |
| 4                                    | 41% (8183)      | 33% (14834)     |                   |
| 5                                    | 9% (1760)       | 7% (3111)       |                   |
| 6                                    | 3% (534)        | 4% (1659)       | p<0.0001          |
| BMI (kg/m <sup>2</sup> )             | 25.8 (4.2)      | 26.1 (4.3)      | p<0.0001          |
| Systolic BP (mmHg)                   | 125.1 (14.8)    | 125.4 (15.0)    | p=0.010           |
| Diastolic BP (mmHg)                  | 78.3 (10.4)     | 78.2 (10.5)     | p=0.435           |
| Healthy diet                         | 69.8% (13873)   | 70.0% (31540)   | p=0.657           |
| Non-smokers                          | 85.8% (17049)   | 84.7% (38198)   | p<0.0001          |
| Back/Neck pain (often/very often)    | 19.0% (3777)    | 19.9% (8954)    | p=0.010           |
| Overall stress (often/very often)    | 13.8% (2749)    | 12.6% (5685)    | p<0.0001          |
| Global health (poor/very poor)       | 5.9 % (1165)    | 5.9% (2645)     | p=0.956           |
| Sleeping problems (often/very often) | 8.9% (987)      | 9.5% (3107)     | p=0.046           |

Data is presented as mean (SD) or % (n). Differences between continuous variables and percentages were tested using independent t-tests and chi<sup>2</sup> test, respectively.

2

3
